# Supplementary material for: TMEM43 Mutation p.S358L Alters Intercalated Disc Protein Expression and Reduces Conduction Velocity in Arrhythmogenic Right Ventricular Cardiomyopathy
Source: PubMed Central journal article supplement (PMC4208740; doi:10.1371/journal.pone.0109128), 2014-10-24
Supplement: pone.0109128.s005.pdf [file pone.0109128.s005.pdf]

**Table S1. Published ARVC mutations<sup>1</sup>**

| <b>Type</b> | <b>Gene</b> | <b>Locus</b> | <b>Function</b>                                                                                                                                                                            |
|-------------|-------------|--------------|--------------------------------------------------------------------------------------------------------------------------------------------------------------------------------------------|
| ARVC1       | TGFβ3       | 14q23-q24    | Transcription factor ligand, modulates cell adhesion and promotes myocardial fibrosis [2]                                                                                                  |
| ARVC2       | RYR2        | 1q42-q43     | Calcium channel for calcium-induced calcium release (CICR), induces the release of calcium from the sarcoplasmic reticulum into the cytosol [3]                                            |
| ARVC3       | Unknown     | 14q12-q22    | Unknown                                                                                                                                                                                    |
| ARVC4       | Unknown     | 2q32.1-q32.3 | Unknown                                                                                                                                                                                    |
| ARVC5       | TMEM43      | 3p25         | Unknown                                                                                                                                                                                    |
| ARVC6       | Unknown     | 10p14-p12    | Unknown                                                                                                                                                                                    |
| ARVC7       | Unknown     | 10q22.3      | Unknown                                                                                                                                                                                    |
| ARVC8       | DSP         | 6p24         | Anchors intermediate filaments to desmosomal plaques [4]                                                                                                                                   |
| ARVC9       | PKP2        | 12p11        | Role in transcriptional regulation and links cadherens to intermediate filaments in desmosome plaque [5]                                                                                   |
| ARVC10      | DSG2        | 18q12.1-q12  | Calcium-binding transmembrane glycoprotein, involved in the interaction of plaque proteins and mediates cell-cell adhesion [6]                                                             |
| ARVC11      | DSC2        | 18q12.1      | Calcium-dependent glycoprotein member of the cadherin superfamily may contribute to desmosome and gap junction interdependence through connexin43 regulation [7]                           |
| ARVC12      | JUP         | 17q21        | Common junctional plaque protein. Forms complexes with cadherins and desmosomal cadherins (DSC2 and DSG2), plays a central role in the structure and function of submembranous plaques [8] |

The table reflects the current available information of the ARVC mutations. Data was obtained from NCBI gene data base<sup>1</sup>.

## References

1. McNally E, MacCleod H, Dellafave L (2005) Arrhythmogenic Right Ventricular Dysplasia/Cardiomyopathy, Autosomal Dominant. NCBI Gene. <http://www.ncbi.nlm.nih.gov/books/NBK1131/>
2. Beffagna G, Occhi G, Nava A, Vitiello L, Ditadi A, Basso C, Bauce B, Carraro G, Thiene G, Towbin JA, Danieli GA, Rampazzo A (2005) Regulatory mutations in transforming growth factor-beta3 gene cause arrhythmogenic right ventricular cardiomyopathy type 1. *Cardiovascular research* 6: 366–73.
3. Jiang D, Wang R, Xiao B, Kong H, Hunt DJ, et al (2005) Enhanced store overload-induced Ca<sup>2+</sup> release and channel sensitivity to luminal Ca<sup>2+</sup> activation are common defects of RyR2 mutations linked to ventricular tachycardia and sudden death. *Circulation research* 97: 1173-1181.
4. Rampazzo A, Nava A, Malacrida S, Beffagna G, Bauce B, Rossi V, et al (2002) Mutation in human desmoplakin domain binding to plakoglobin causes a dominant form of arrhythmogenic right ventricular cardiomyopathy. *Am. J. Hum. Genet* 71: 1200-1206.
5. Mertens C, Hofmann I, Wang Z, Teichmann M, Sepehri CS, Schnolzer M, Franke WW (2001) Nuclear particles containing RNA polymerase III complexes associated with the junctional plaque protein plakophilin 2. *Proc. Nat. Acad. Sci.* 98: 7795-7800.
6. Nekrasova OE, Amargo EV, Smith WO, Chen J, Kreitzer GE, Green KJ (2011) Desmosomal cadherins utilize distinct kinesins for assembly into desmosomes. *J Cell Biol.* 195: 185-203.
7. Gehmlich K, Lambiase PD, Asimaki A, Ciaccio EJ, Ehler E, Syrris P, Saffitz JE, McKenna WJ (2011) A novel desmocollin-2 mutation reveals insights into the molecular link between desmosomes and gap junctions. *Heart Rhythm.* 8: 711-8.
8. Delmar M, McKenna WJ (2010) The cardiac desmosome and arrhythmogenic cardiomyopathies: from gene to disease. *Circulation research.* 107: 700-14.
